# Supplementary material for: Quality Attributes and Storage of Tomato Fruits as Affected by an Eco-Friendly, Essential Oil-Based Product
Source: MDPI journal article supplement (doi:10.3390/plants10061125), 2021-06-01
Supplement: s1 [file s1]

# Quality Attributes and Storage of Tomato Fruits as Affected by an Eco-friendly, Essential Oil-based Product

Panayiota Xylia, Irene Ioannou, Antonios Chrysargyris, Menelaos Stavrinides and Nikolaos Tzortzakis\*

Department of Agricultural Sciences, Biotechnology and Food Science, Cyprus University of Technology, 3036, Limassol, Cyprus: pa.xylia@edu.cut.ac.cy (P.X.); i.ioannou1996@gmail.com (I.I.); a.chrysargyris@cut.ac.cy (A.C.); m.stavrinides@cut.ac.cy (M.S.)

\* Correspondence: nikolaos.tzortzakis@cut.ac.cy; Tel.: +357-250-022-80

## Supplementary Materials

**Table S1.** Chemical composition (%) of essential oils of rosemary (*Rosmarinus officinalis* L.) and eucalyptus (*Eucalyptus crabra* L.).

| Rosemary |                             |       |       | Eucalyptus |                             |       |       |
|----------|-----------------------------|-------|-------|------------|-----------------------------|-------|-------|
| RI       | Compound                    | Mean  | SE    | RI         | Compound                    | Mean  | SE    |
| 921      | tricyclene                  | 0.44  | ±0.02 | 921        | tricyclene                  | 0.11  | ±0.00 |
| 926      | α thujene                   | 0.04  | ±0.00 | 926        | α thujene                   | 0.05  | ±0.00 |
| 933      | α pinene                    | 25.71 | ±1.36 | 933        | α pinene                    | 24.12 | ±0.02 |
| 948      | camphene                    | 2.88  | ±0.08 | 944        | α fenchene                  | 0.31  | ±0.01 |
| 977      | β pinene                    | 2.55  | ±0.02 | 948        | camphene                    | 1.37  | ±0.00 |
| 989      | β myrcene                   | 0.12  | ±0.01 | 977        | β pinene                    | 1.09  | ±0.01 |
| 1024     | p cymene                    | 1.12  | ±0.02 | 989        | β myrcene                   | 0.61  | ±0.01 |
| 1028     | D-limonene                  | 2.87  | ±0.06 | 1000       | δ 2 carene                  | 0.09  | ±0.00 |
| 1031     | eucalyptol                  | 10.81 | ±0.14 | 1004       | α phellandrene              | 0.56  | ±0.00 |
| 1058     | γ terpinene                 | 0.39  | ±0.02 | 1012       | δ 3 carene                  | 20.10 | ±0.05 |
| 1132     | terpineol-1                 | 0.11  | ±0.01 | 1013       | 1,4-cineole                 | 1.72  | ±0.03 |
| 1145     | camphor                     | 0.86  | ±0.05 | 1014       | α terpinene                 | 0.49  | ±0.04 |
| 1155     | isoborneol                  | 30.29 | ±0.43 | 1024       | p cymene                    | 1.08  | ±0.01 |
| 1161     | trans β terpineol           | 0.28  | ±0.01 | 1028       | D-limonene                  | 3.82  | ±0.02 |
| 1166     | borneol                     | 0.37  | ±0.02 | 1031       | eucalyptol                  | 26.51 | ±0.06 |
| 1178     | terpinen-4-ol               | 0.57  | ±0.04 | 1058       | γ terpinene                 | 0.69  | ±0.00 |
| 1191     | α terpineol                 | 14.89 | ±0.36 | 1089       | terpinolene                 | 2.48  | ±0.00 |
| 1196     | γ terpineol                 | 2.65  | ±0.11 | 1145       | camphor                     | 5.58  | ±0.03 |
| 1253     | geraniol                    | 0.16  | ±0.03 | 1155       | isoborneol                  | 0.31  | ±0.02 |
| 1255     | linalool acetate            | 0.12  | ±0.00 | 1191       | α terpineol                 | 3.45  | ±0.03 |
| 1284     | isobornyl acetate           | 0.87  | ±0.05 | 1196       | γ terpineol                 | 0.45  | ±0.01 |
| 1349     | α terpinyl acetate          | 0.66  | ±0.04 | 1284       | isobornyl acetate           | 4.96  | ±0.03 |
| 1425     | β caryophyllene             | 0.27  | ±0.02 |            |                             |       |       |
|          | Total Identified            | 99.05 | ±0.05 |            | Total Identified            | 99.96 | ±0.01 |
|          | Not Identified              | 0.95  | ±0.05 |            | Not Identified              | 0.04  | ±0.01 |
|          | Monoterpenes hydrocarbons   | 36.13 | ±1.37 |            | Monoterpenes hydrocarbons   | 56.99 | ±0.04 |
|          | Oxygenated monoterpenes     | 60.99 | ±1.19 |            | Oxygenated monoterpenes     | 38.02 | ±0.05 |
|          | Sesquiterpenes hydrocarbons | 0.27  | ±0.02 |            | Sesquiterpenes hydrocarbons | 0.00  | ±0.00 |
|          | Oxygenated sesquiterpenes   | 0.50  | ±0.50 |            | Oxygenated sesquiterpenes   | 0.00  | ±0.00 |
|          | Others                      | 1.66  | ±0.10 |            | Others                      | 4.96  | ±0.03 |

Values are means ( $n = 3$ ) and standard error.
